# Supplementary material
Source: PubMed Central journal article supplement (PMC3748501)
Supplement: SD3.pdf [file SD3.pdf]

SUPPLEMENTAL TABLE 1  
Relationship of knowledge and attitudes about diarrhea and care-seeking behavior: univariate analysis

|                                                          | Did not seek care<br>(N = 65) | Sought care<br>(N = 284) | Crude odds ratio<br>(95% confidence interval) | P value |
|----------------------------------------------------------|-------------------------------|--------------------------|-----------------------------------------------|---------|
| Do you know ways to prevent these types of diarrhea? (%) |                               |                          |                                               |         |
| Simple loose watery diarrhea                             | 50.4                          | 53.1                     | 0.16 (0.11–0.74)                              | 0.74    |
| Rice watery diarrhea                                     | 49.3                          | 42.4                     | 0.76 (0.4–1.45)                               | 0.40    |
| Bloody diarrhea                                          | 47.4                          | 40.1                     | 0.74 (0.39–1.42)                              | 0.37    |
| Best way to prevent diarrhea* (%)                        |                               |                          |                                               |         |
| Clean water and food                                     | 45.8                          | 40.6                     | 0.81 (0.42–1.55)                              | 0.52    |
| Improved nutrition                                       | 31.3                          | 18.7                     | 0.5 (0.24–1.08)                               | 0.08    |
| Hand washing                                             | 27.6                          | 23.9                     | 0.82 (0.39–1.74)                              | 0.61    |
| Medications                                              | 6.4                           | 7.8                      | 1.25 (0.34–4.57)                              | 0.74    |
| Proper disposal of human waste                           | 5.6                           | 6.8                      | 1.22 (0.41–3.58)                              | 0.72    |
| Vaccines                                                 | 1.7                           | 2.4                      | 1.4 (0.25–7.77)                               | 0.70    |
| Breastfeeding                                            | 5.2                           | 1.5                      | 0.28 (0.05–1.71)                              | 0.17    |
| Knowledge of mothers regarding signs of dehydration (%)  |                               |                          |                                               |         |
| Dry mouth                                                | 6.1                           | 14.1                     | 2.51 (0.71–8.96)                              | 0.16    |
| Decreased urination                                      | 1.1                           | 2.6                      | 2.46 (0.27–22.34)                             | 0.42    |
| Sunken eyes                                              | 34.4                          | 27.3                     | 0.72 (0.36–1.44)                              | 0.35    |
| Wrinkled skin                                            | 8.1                           | 3.9                      | 0.46 (0.14–1.53)                              | 0.20    |
| Lethargy                                                 | 76.2                          | 60.1                     | 0.47 (0.22–0.99)                              | 0.05    |
| Coma/loss of consciousness                               | 1.2                           | 1.4                      | 1.18 (0.12–12.11)                             | 0.89    |
| Increase thirst                                          | 5.5                           | 17.8                     | 3.71 (0.9–15.29)                              | 0.07    |

\*Multiple responses.

SUPPLEMENTAL TABLE 2

Relationship between demographic and socioeconomic factors, home care practices, clinical indicators, and logistical issues with care-seeking practices of families with diarrheal children: univariate analysis

|                                                  | Did not seek care<br>(N = 65) | Sought care<br>(N = 284) | Crude odds ratio<br>(95% confidence interval) | P value |
|--------------------------------------------------|-------------------------------|--------------------------|-----------------------------------------------|---------|
| Age (months)                                     | 25.8 ± 46.8                   | 24.1 ± 47.4              | 0.99 (0.97–1.01)                              | 0.47    |
| People living in house for past 6 months         | 9.3 ± 19.8                    | 9.2 ± 16.2               | 0.99 (0.93–1.07)                              | 0.88    |
| Number of rooms in the house                     | 2.4 ± 5.4                     | 2.2 ± 4.5                | 0.9 (0.72–1.12)                               | 0.34    |
| Total under 5-year-old children                  | 2.2 ± 3                       | 2.3 ± 5.3                | 1.04 (0.89–1.23)                              | 0.59    |
| Wealth index                                     | 0.20 ± 3.53                   | −0.08 ± 3.10             | 0.75 (0.56–1.01)                              | 0.06    |
| Child's age stratum (%)                          |                               |                          |                                               |         |
| 0–11 months                                      | 19.2                          | 27.1                     | Reference                                     |         |
| 12–23 months                                     | 30.9                          | 23.3                     | 0.71 (0.34–1.46)                              | 0.92    |
| 24–59 months                                     | 49.9                          | 49.6                     | 0.53 (0.29–1)                                 | 0.11    |
| Male child (%)                                   | 53.8                          | 50.4                     | Reference                                     |         |
| Female child (%)                                 | 46.2                          | 49.6                     | 1.15 (0.6–2.18)                               | 0.68    |
| No formal education (%)                          | 87.2                          | 87.2                     | Reference                                     |         |
| Formal education (%)                             | 12.8                          | 12.8                     | 1 (0.42–2.39)                                 | 0.99    |
| Relationship with child (mother; %)              | 96                            | 95.6                     | Reference                                     |         |
| Other (%)                                        | 4                             | 4.4                      | 1.12 (0.31–4.02)                              | 0.86    |
| Difficulties in seeking care (%)                 |                               |                          |                                               |         |
| Flooding                                         | 1.1                           | 3.1                      | 2.95 (0.33–26.45)                             | 0.33    |
| Lack of transportation                           | 13.7                          | 13.2                     | 0.96 (0.35–2.65)                              | 0.94    |
| Heavy rain                                       | 6.4                           | 9.6                      | 0.33 (0.48–0.49)                              | 0.49    |
| Never a problem                                  | 44.9                          | 56.3                     | 1.58 (0.83–3.02)                              | 0.17    |
| Cost of treatment too high                       | 14.3                          | 6.0                      | 0.39 (0.15–1)                                 | 0.05    |
| Lack of childcare for other children             | 9.5                           | 9.5                      | 0.99 (0.35–2.84)                              | 0.99    |
| Treatment given at home before seeking care* (%) |                               |                          |                                               |         |
| Oral rehydration solution                        | 37.3                          | 31.4                     | 0.77 (0.39–1.51)                              | 0.44    |
| Homemade fluid                                   | 30.7                          | 25.7                     | 0.78 (0.38–1.6)                               | 0.50    |
| Milk or formula                                  | 1.2                           | 2.3                      | 1.99 (0.25–16.08)                             | 0.52    |
| Herbal medication                                | 6.1                           | 3.2                      | 0.5 (0.13–2.03)                               | 0.33    |
| No remedies given                                | 24.7                          | 43.8                     | 2.37 (1.1–5.11)                               | 0.03    |
| Antibiotics                                      | 11                            | 3.6                      | 0.3 (0.1–0.92)                                | 0.04    |
| Offered to eat                                   | 33.4                          | 33.3                     | 1 (0.5–2.01)                                  | 1.00    |
| Offered to drink                                 | 9.6                           | 11.9                     | 1.26 (0.46–3.45)                              | 0.65    |
| Clinical symptoms of children with diarrhea (%)  |                               |                          |                                               |         |
| Blood in stools                                  | 10.8                          | 8.7                      | 0.78 (0.25–2.41)                              | 0.67    |
| Rice watery stools                               | 35.1                          | 49.9                     | 1.84 (0.96–3.55)                              | 0.07    |
| Mucus/pus in stools                              | 40                            | 47.2                     | 1.34 (0.7–2.57)                               | 0.37    |
| Decreased urination                              | 26.9                          | 31.2                     | 1.24 (0.6–2.54)                               | 0.57    |
| Increase thirst                                  | 84.2                          | 91.8                     | 2.11 (0.85–5.2)                               | 0.11    |
| Dry mouth                                        | 69.3                          | 84.6                     | 2.43 (1.16–5.12)                              | 0.02    |
| Sunken eyes                                      | 61.8                          | 81.4                     | 2.7 (1.35–5.41)                               | 0.01    |
| Wrinkled skin                                    | 46                            | 62.4                     | 1.95 (1.02–3.71)                              | 0.04    |
| Fever                                            | 53.7                          | 79.9                     | 3.44 (1.73–6.83)                              | 0.00    |
| Vomiting                                         | 20                            | 34.3                     | 2.08 (0.96–4.52)                              | 0.06    |
| Lethargy                                         | 75.3                          | 93                       | 4.34 (1.77–10.66)                             | 0.00    |
| Coma/loss of consciousness                       | 8.1                           | 8.3                      | 1.03 (0.33–3.2)                               | 0.96    |
| Duration of diarrhea (days)                      | 6.6 ± 40.9                    | 7.7 ± 35.1               | 1.01 (0.98–1.05)                              | 0.56    |
| More than six stools per day                     | 14.1                          | 26.1                     | 2.14 (0.9–5.08)                               | 0.08    |

\*Multiple responses.

SUPPLEMENTAL TABLE 3

Prevalence of diarrhea in children under 5 years of age and healthcare use trends over time (2009–2011)

|                                                                 | Round     |           |           |           |           |
|-----------------------------------------------------------------|-----------|-----------|-----------|-----------|-----------|
|                                                                 | 1         | 2         | 3         | 4         | 5         |
| <i>n</i> (0–11 months)                                          | 383       | 382       | 285       | 339       | 375       |
| Had diarrhea in the last 2 weeks (%)                            | 45 (11.7) | 68 (17.8) | 63 (22.1) | 68 (20.1) | 57 (15.2) |
| Sought care (%)                                                 | 32 (71.1) | 45 (66.1) | 46 (73.0) | 54 (79.4) | 42 (73.6) |
| Moderate-to-severe diarrhea (%)                                 | 20 (5.2)  | 10 (2.6)  | 15 (5.3)  | 17 (5)    | 19 (5.1)  |
| Moderate-to-severe diarrhea visiting sentinel health center (%) | 3 (15.0)  | 0 (0.0)   | 4 (26.6)  | 7 (41.2)  | 5 (26.3)  |
| Severity of diarrhea (%)                                        |           |           |           |           |           |
| Dysentery                                                       | 0 (0.0)   | 0 (0.0)   | 2 (0.7)   | 2 (0.6)   | 6 (1.6)   |
| Required hospitalization                                        | 2 (0.5)   | 0 (0.0)   | 2 (0.7)   | 0 (0.0)   | 2 (0.5)   |
| Intravenous rehydration                                         | 3 (0.8)   | 1 (0.3)   | 5 (1.8)   | 1 (0.3)   | 3 (0.8)   |
| Sunken eyes                                                     | 12 (3.1)  | 9 (2.4)   | 12 (4.2)  | 14 (4.1)  | 14 (3.7)  |
| Wrinkled skin                                                   | 7 (1.8)   | 4 (1.0)   | 2 (0.7)   | 3 (0.9)   | 2 (0.5)   |
| <i>n</i> (12–23 months)                                         | 317       | 343       | 279       | 363       | 362       |
| Had diarrhea in the last 2 weeks (%)                            | 53 (16.7) | 44 (12.8) | 44 (15.7) | 71 (19.5) | 68 (18.7) |
| Sought care (%)                                                 | 34 (64.1) | 19 (43.2) | 26 (59.1) | 55 (77.4) | 44 (64.7) |
| Moderate-to-severe diarrhea (%)                                 | 25 (7.9)  | 7 (2)     | 10 (3.6)  | 17 (4.7)  | 14 (3.9)  |
| Moderate-to-severe diarrhea visiting sentinel health center (%) | 5 (20.0)  | 1 (14.3)  | 1 (10.0)  | 4 (23.5)  | 4 (28.6)  |
| Severity of diarrhea (%)                                        |           |           |           |           |           |
| Dysentery                                                       | 2 (0.6)   | 1 (0.3)   | 3 (1.1)   | 0 (0.0)   | 1 (0.3)   |
| Required hospitalization                                        | 4 (1.3)   | 0 (0.0)   | 0 (0.0)   | 0 (0.0)   | 0 (0.0)   |
| Intravenous rehydration                                         | 5 (1.6)   | 0 (0.0)   | 1 (0.4)   | 1 (0.3)   | 1 (0.3)   |
| Sunken eyes                                                     | 18 (5.7)  | 5 (1.5)   | 7 (2.5)   | 14 (3.9)  | 14 (3.9)  |
| Wrinkled skin                                                   | 15 (4.7)  | 2 (0.6)   | 0 (0.0)   | 2 (0.6)   | 0 (0.0)   |
| <i>n</i> (24–59 months)                                         | 347       | 352       | 262       | 335       | 352       |
| Had diarrhea in the last 2 weeks (%)                            | 27 (7.7)  | 31 (8.8)  | 34 (12.9) | 30 (8.9)  | 31 (8.8)  |
| Sought care (%)                                                 | 17 (62.9) | 22 (70.9) | 26 (76.4) | 25 (83.3) | 23 (74.2) |
| Moderate-to-severe diarrhea (%)                                 | 17 (4.9)  | 6 (1.7)   | 13 (5)    | 4 (1.2)   | 5 (1.4)   |
| Moderate-to-severe diarrhea visiting sentinel health center (%) | 2 (11.8)  | 2 (33.3)  | 4 (30.8)  | 2 (50.0)  | 1 (20.0)  |
| Severity of diarrhea (%)                                        |           |           |           |           |           |
| Dysentery                                                       | 1 (0.3)   | 1 (0.3)   | 2 (0.8)   | 0 (0.0)   | 0 (0.0)   |
| Required hospitalization                                        | 2 (0.6)   | 1 (0.3)   | 1 (0.4)   | 0 (0.0)   | 0 (0.0)   |
| Intravenous rehydration                                         | 6 (1.7)   | 3 (0.9)   | 1 (0.4)   | 1 (0.3)   | 0 (0.0)   |
| Sunken eyes                                                     | 13 (3.7)  | 0 (0.0)   | 11 (4.2)  | 3 (0.9)   | 5 (1.4)   |
| Wrinkled skin                                                   | 8 (2.3)   | 2 (0.6)   | 4 (1.5)   | 1 (0.3)   | 1 (0.3)   |
| <i>n</i> (0–59 months)*                                         | 1,047     | 1,077     | 826       | 1,037     | 1,089     |
| Had diarrhea in the last 2 weeks (%)                            | 10.1      | 11.0      | 15.2      | 13.0      | 11.8      |
| Sought care (%)                                                 | 83.5      | 63.6      | 72.3      | 80.5      | 71.4      |
| Moderate-to-severe diarrhea (%)                                 | 5.5       | 1.9       | 4.8       | 2.5       | 2.6       |
| Moderate-to-severe diarrhea visiting sentinel health center (%) | 14.5      | 22.1      | 27.1      | 37.0      | 24.7      |
| Severity of diarrhea (%)                                        |           |           |           |           |           |
| Dysentery                                                       | 0.31      | 0.24      | 0.81      | 0.10      | 0.36      |
| Required hospitalization                                        | 0.70      | 0.18      | 0.37      | 0.00      | 0.10      |
| Intravenous rehydration                                         | 1.56      | 0.60      | 0.63      | 0.29      | 0.21      |
| Sunken eyes                                                     | 4.03      | 0.66      | 3.89      | 2.04      | 2.31      |
| Wrinkled skin                                                   | 2.71      | 0.65      | 1.10      | 0.45      | 0.28      |

Round 1 (March to August of 2009). Round 2 (August of 2009 to January of 2010). Round 3 (January to May of 2010). Round 4 (July to December of 2010). Round 5 (January to March of 2011).  
 \*Only weighted proportions are reported.
